# Supplementary material for: Monocationic gold(iii) Gly-l-His and l-Ala-l-His dipeptide complexes: crystal structures arising from solvent free and solvent-containing crystal formation and structural modifications tuned by counter-anions
Source: Royal Society of Chemistry journal article supplement (doi:10.1039/c0dt00163e), 2010-01-01
Supplement: c0dt00163e.pdf [file c0dt00163e.pdf]

# ELECTRONIC SUPPLEMENTARY INFORMATION

## Monocationic gold(III) Gly-L-His and L-Ala-L-His dipeptide complexes: crystal structures arising from solvent free and solvent-containing crystal formation and structural modifications tuned by counter-anions

Urszula Rychlewska,<sup>a</sup> Beata Warżajtis,<sup>a</sup> Biljana Đ. Glišić,<sup>b</sup> Marija D. Živković,<sup>b</sup> Snežana Rajković<sup>b</sup> and Miloš I. Djuran<sup>\*b</sup>

<sup>a</sup>Faculty of Chemistry, Adam Mickiewicz University, Grunwaldzka 6, 60-780 Poznań, Poland

<sup>b</sup>Department of Chemistry, Faculty of Science, University of Kragujevac, R. Domanovića 12, P.O. Box 60, 34000 Kragujevac, Serbia

### Abstract

Monocationic gold(III) complexes with histidine-containing peptides, glycyl-L-histidine (Gly-L-His) and L-alanyl-L-histidine (L-Ala-L-His) have been synthesized and characterized by <sup>1</sup>H NMR spectroscopy and X-ray crystallography. The crystallized Au(III) complexes, [Au(Gly-L-His-*N,N',N''*)Cl]NO<sub>3</sub>·1.25H<sub>2</sub>O and [Au(L-Ala-L-His-*N,N',N''*)Cl]NO<sub>3</sub>·2.5H<sub>2</sub>O, were obtained from water solution at pH < 1.0. The chemical shifts in the <sup>1</sup>H NMR spectra of [Au(Gly-L-His-*N,N',N''*)Cl]NO<sub>3</sub>·1.25H<sub>2</sub>O and [Au(L-Ala-L-His-*N,N',N''*)Cl]NO<sub>3</sub>·2.5H<sub>2</sub>O complexes were compared with those for the corresponding Pd(II) complexes and for Pd(II) and Au(III) complexes with Gly-Gly-L-His tripeptide. Crystal data for the hydrated [Au(Gly-L-His-*N,N',N''*)Cl]NO<sub>3</sub>·1.25H<sub>2</sub>O complex and its serendipitously obtained unhydrated form were compared with previously reported X-ray data for the hydrated chloride complex [Au(Gly-L-His-*N,N',N''*)Cl]Cl·3H<sub>2</sub>O and with the analogous, though uncharged, Pd(II) and Pt(II) complexes. Furthermore, in the present study the crystal structure of the nitrate salt of Au(III) complex with L-Ala-L-His dipeptide, [Au(L-Ala-L-His-*N,N',N''*)Cl]NO<sub>3</sub>·2.5H<sub>2</sub>O has been determined.

**Keywords:** Gold(III) complexes; Glycyl-L-histidine; L-Alanyl-L-histidine; Proton NMR spectroscopy; X-Ray crystallography.

**Table 1S** Selected bond distances (Å) and bond angles (°) for Au(III) complexes

|            | [Au(Gly-L-His- <i>N,N',N''</i> )Cl]NO <sub>3</sub> ·1.25H <sub>2</sub> O | [Au(Gly-L-His- <i>N,N',N''</i> )Cl]NO <sub>3</sub> | [Au(L-Ala-L-His- <i>N,N',N''</i> )Cl]NO <sub>3</sub> ·2.5H <sub>2</sub> O |
|------------|--------------------------------------------------------------------------|----------------------------------------------------|---------------------------------------------------------------------------|
| Au1—N1     | 1.987(8)<br>2.026(10)                                                    | 2.034(13)                                          | 2.019(5)                                                                  |
| Au1—N2     | 2.020(10)<br>2.021(10)                                                   | 2.010(13)                                          | 1.995(5)                                                                  |
| Au1—N3     | 1.996(9)<br>1.913(10)                                                    | 1.998(11)                                          | 2.001(6)                                                                  |
| Au1—Cl1    | 2.293(3)<br>2.297(3)                                                     | 2.294(4)                                           | 2.2869(16)                                                                |
| N1—Au1—N2  | 82.8(4)<br>82.3(4)                                                       | 84.1(5)                                            | 81.7(2)                                                                   |
| N1—Au1—N3  | 175.3(4)<br>175.4(4)                                                     | 174.1(6)                                           | 175.8(2)                                                                  |
| N3—Au1—N2  | 92.7(4)<br>93.2(4)                                                       | 91.0(5)                                            | 94.2(2)                                                                   |
| N1—Au1—Cl1 | 92.5(2)<br>92.2(3)                                                       | 94.0(3)                                            | 92.93(17)                                                                 |
| N2—Au1—Cl1 | 174.7(3)<br>174.0(3)                                                     | 174.2(4)                                           | 174.56(17)                                                                |
| N3—Au1—Cl1 | 92.1(3)<br>92.4(3)                                                       | 91.3(3)                                            | 91.20(17)                                                                 |

**Table 2S** Hydrogen bond parameters for Au(III) complexes with Gly-L-His and L-Ala-L-His dipeptides

**[Au(Gly-L-His-*N,N',N''*)Cl]NO<sub>3</sub>·1.25H<sub>2</sub>O**

| <i>D</i> —H... <i>A</i>       | <i>D</i> —H(Å) | H... <i>A</i> (Å) | <i>D</i> ... <i>A</i> (Å) | <i>D</i> —H... <i>A</i> (°) |
|-------------------------------|----------------|-------------------|---------------------------|-----------------------------|
| N1—H1N...O2W <sup>i</sup>     | 0.90           | 2.07              | 2.961(15)                 | 171                         |
| N1—H2N...O1 <sup>ii</sup>     | 0.90           | 2.16              | 2.876(18)                 | 136                         |
| N1'—H1N'...O2W <sup>i</sup>   | 0.90           | 2.05              | 2.932(15)                 | 166                         |
| N1'—H2N'...O5N <sup>i</sup>   | 0.90           | 2.11              | 2.971(16)                 | 161                         |
| N4—H4N...O6N                  | 0.86           | 2.08              | 2.90(2)                   | 159                         |
| N4'—H4N'...O1N <sup>iii</sup> | 0.86           | 2.00              | 2.849(17)                 | 171                         |
| O3—H3O...O1N                  | 0.82           | 2.03              | 2.680(15)                 | 135                         |
| O3'—H3O'...O1W                | 0.82           | 1.92              | 2.709(17)                 | 162                         |
| O1W...O3W <sup>iv</sup>       |                |                   | 2.728(17)                 |                             |
| O2W...O2N <sup>v</sup>        |                |                   | 2.770(17)                 |                             |
| O2W...O3N <sup>v</sup>        |                |                   | 3.217(18)                 |                             |
| O2W...O5N <sup>iv</sup>       |                |                   | 2.843(15)                 |                             |
| O3W...O4N <sup>vi</sup>       |                |                   | 2.833(22)                 |                             |
| O3W...O6N                     |                |                   | 3.064(19)                 |                             |

Symmetry codes: (i)  $x-1/2, y+1/2, z$ ; (ii)  $-x+3/2, y-1/2, -z+2$ ; (iii)  $-x+2, y, -z+2$ ; (iv)  $x, y-l, z$ ; (v)  $-x+2, y-l, -z+2$ ; (vi)  $x, y+l, z$ .

**[Au(Gly-L-His-*N,N',N''*)Cl]NO<sub>3</sub>**

| <i>D</i> —H... <i>A</i>     | <i>D</i> —H(Å) | H... <i>A</i> (Å) | <i>D</i> ... <i>A</i> (Å) | <i>D</i> —H... <i>A</i> (°) |
|-----------------------------|----------------|-------------------|---------------------------|-----------------------------|
| N1—H1NB...O2N <sup>i</sup>  | 0.90           | 2.28              | 3.074(19)                 | 146                         |
| N1—H1NA...O1 <sup>ii</sup>  | 0.90           | 2.22              | 2.87(3)                   | 129                         |
| N4—H4N...O1N                | 0.86           | 1.97              | 2.815(18)                 | 166                         |
| O3—H3O...O1N <sup>iii</sup> | 0.82           | 1.76              | 2.53(2)                   | 158                         |

Symmetry codes: (i)  $x, y, z-1$ ; (ii)  $-x+3/2, y+1/2, -z$ ; (iii)  $x+1/2, -y+3/2, -z+1$ .

**[Au(L-Ala-L-His-*N,N',N''*)Cl]NO<sub>3</sub>·2.5H<sub>2</sub>O**

| <i>D</i> —H... <i>A</i> | <i>D</i> —H(Å) | H... <i>A</i> (Å) | <i>D</i> ... <i>A</i> (Å) | <i>D</i> —H... <i>A</i> (°) |
|-------------------------|----------------|-------------------|---------------------------|-----------------------------|
| O3—H3O...O1W            | 0.82           | 1.85              | 2.653(14)                 | 168                         |

|                           |      |      |            |     |
|---------------------------|------|------|------------|-----|
| N1—H1N···O2W              | 0.90 | 2.00 | 2.887 (9)  | 170 |
| N1—H2N···O3W              | 0.90 | 2.26 | 3.142 (14) | 165 |
| N4—H4N···O2N              | 0.86 | 1.96 | 2.808 (19) | 170 |
| N4—H4N···O1N'             | 0.86 | 2.08 | 2.89 (3)   | 157 |
| N4—H4N···O3N'             | 0.86 | 2.33 | 3.07 (4)   | 144 |
| O1W···O1N' <sup>i</sup>   |      |      | 2.64 (3)   |     |
| O1W···O2N' <sup>ii</sup>  |      |      | 2.52(2)    |     |
| O2W···O3N' <sup>iii</sup> |      |      | 3.036 (16) |     |
| O2W···O3N' <sup>iv</sup>  |      |      | 3.036 (16) |     |
| O3W···O1' <sup>v</sup>    |      |      | 2.905 (12) |     |
| O3W···O1N' <sup>vi</sup>  |      |      | 3.033 (24) |     |

Symmetry codes: (i)  $-x+2, y-1, z$ ; (ii)  $-x-1/2, -y+3/2, -z+1$ ; (iii)  $x, y, z-1$ ; (iv)  $-x+2, -y+1, z-1$ ; (v)  $-x+3/2, y-1/2, -z$ ; (vi)  $-x+2, -y, z-1$

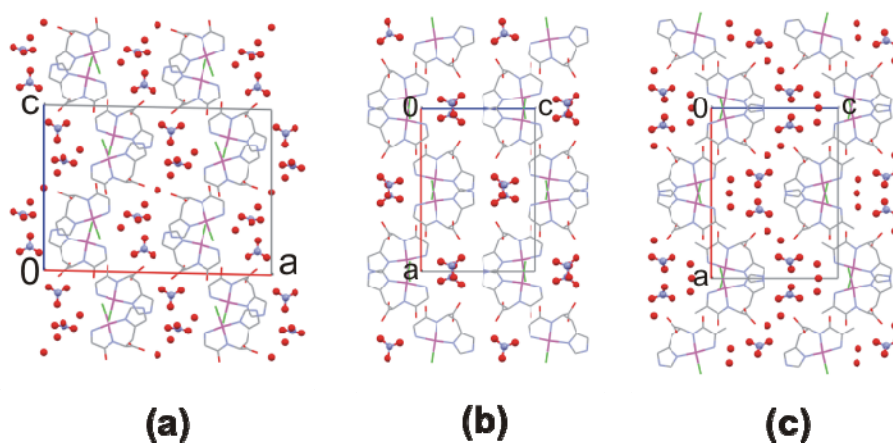

**Fig. 1S** Arrangement of nitrate anions and water molecules (ball and stick representation) with respect to the complex cations (capped sticks, hydrogen atoms omitted) in hydrated (a) and unhydrated (b) crystal forms of [Au(Gly-L-His-*N,N',N''*)Cl]NO<sub>3</sub>, and in [Au(L-Ala-L-His-*N,N',N''*)Cl]NO<sub>3</sub>·2.5H<sub>2</sub>O crystal (c).
